# Supplementary material
Source: PubMed Central journal article supplement (PMC1310896)
Supplement: nar_33_22_6953__1.pdf [file nar_33_22_6953__1.pdf]

## Supplementary Data

**Table S1.** Fluorescence decay parameters for the APout-M.HhaI-AdoHcy single crystal. Fluorescence was excited at 320nm and decays obtained at the 3 emission wavelengths shown were fitted globally to 4 common lifetimes. The global fluorescence lifetimes and global  $\chi^2$  are given, followed by the A factors and local  $\chi^2$  for each decay.

**Global Lifetimes:  $\tau_1=0.07\text{ns}$ ,  $\tau_2=0.53\text{ns}$ ,  $\tau_3=2.07\text{ns}$ ,  $\tau_4=7.36\text{ns}$**   
**Global  $\chi^2=1.052$**

| Emission Wavelength/<br>nm | A1   | A2   | A3   | A4   | Local $\chi^2$ |
|----------------------------|------|------|------|------|----------------|
| 370                        | 0.62 | 0.21 | 0.14 | 0.03 | 1.038          |
| 390                        | 0.64 | 0.19 | 0.14 | 0.03 | 1.073          |
| 410                        | 0.66 | 0.16 | 0.15 | 0.03 | 1.045          |

**Table S2.** Fluorescence decay parameters for the APtarget-M.HhaI-AdoHcy single crystal.

**Global Lifetimes:  $\tau_1=1.10\text{ns}$ ,  $\tau_2=6.30\text{ns}$ ,  $\tau_3=10.85\text{ns}$**   
**Global  $\chi^2=1.023$**

| Emission Wavelength/<br>nm | A1   | A2   | A3   | Local $\chi^2$ |
|----------------------------|------|------|------|----------------|
| 370                        | 0.12 | 0.21 | 0.67 | 1.042          |
| 390                        | 0.07 | 0.16 | 0.77 | 1.004          |
| 410                        | 0.04 | 0.12 | 0.84 | 1.023          |

**Table S3.** Fluorescence decay parameters for the APout duplex in aqueous solution.

**Global Lifetimes:  $\tau_1=0.04\text{ns}$ ,  $\tau_2=0.50\text{ns}$ ,  $\tau_3=2.95\text{ns}$ ,  $\tau_4=11.01\text{ns}$**   
**Global  $\chi^2=1.121$**

| Emission Wavelength/<br>nm | A1   | A2   | A3   | A4   | Local $\chi^2$ |
|----------------------------|------|------|------|------|----------------|
| 370                        | 0.78 | 0.08 | 0.07 | 0.07 | 1.132          |
| 390                        | 0.70 | 0.12 | 0.10 | 0.08 | 1.049          |
| 410                        | 0.65 | 0.19 | 0.10 | 0.06 | 1.181          |

**Table S4.** Fluorescence decay parameters for the APout duplex with M.HhaI (wild type) and AdoHey in aqueous solution.

**Global Lifetimes:  $\tau_1=0.03\text{ns}$ ,  $\tau_2=0.47\text{ns}$ ,  $\tau_3=2.82\text{ns}$ ,  $\tau_4=10.25\text{ns}$**   
**Global  $\chi^2=1.171$**

| Emission Wavelength/ nm | A1   | A2   | A3   | A4   | Local $\chi^2$ |
|-------------------------|------|------|------|------|----------------|
| 370                     | 0.80 | 0.07 | 0.06 | 0.07 | 1.197          |
| 390                     | 0.70 | 0.12 | 0.08 | 0.10 | 1.121          |
| 410                     | 0.70 | 0.14 | 0.08 | 0.08 | 1.196          |

**Table S5.** Fluorescence decay parameters for the APtarget duplex in aqueous solution.

**Global Lifetimes:  $\tau_1=0.08\text{ns}$ ,  $\tau_2=0.58\text{ns}$ ,  $\tau_3=2.94\text{ns}$ ,  $\tau_4=9.60\text{ns}$**   
**Global  $\chi^2=1.137$**

| Emission Wavelength/ nm | A1   | A2   | A3   | A4   | Local $\chi^2$ |
|-------------------------|------|------|------|------|----------------|
| 370                     | 0.60 | 0.18 | 0.13 | 0.09 | 1.170          |
| 390                     | 0.53 | 0.27 | 0.14 | 0.06 | 1.092          |
| 410                     | 0.51 | 0.30 | 0.14 | 0.05 | 1.149          |

**Table S6.** Fluorescence decay parameters for the APtarget duplex with M.HhaI (T250G) in aqueous solution.

**Global Lifetimes:  $\tau_1=0.14\text{ns}$ ,  $\tau_2=1.01\text{ns}$ ,  $\tau_3=5.26\text{ns}$ ,  $\tau_4=12.58\text{ns}$**   
**Global  $\chi^2=1.045$**

| Emission Wavelength/ nm | A1   | A2   | A3   | A4   | Local $\chi^2$ |
|-------------------------|------|------|------|------|----------------|
| 70                      | 0.19 | 0.14 | 0.22 | 0.45 | 1.065          |
| 390                     | 0.19 | 0.16 | 0.19 | 0.46 | 1.008          |
| 410                     | 0.26 | 0.20 | 0.16 | 0.38 | 1.062          |

**Table S7.** Fluorescence decay parameters for the APtarget duplex with M.HhaI (T250G) and AdoMet in aqueous solution.

**Global Lifetimes:  $\tau_1=0.17\text{ns}$ ,  $\tau_2=1.14\text{ns}$ ,  $\tau_3=6.01\text{ns}$ ,  $\tau_4=12.63\text{ns}$**   
**Global  $\chi^2=1.004$**

| Emission Wavelength/ nm | A1   | A2   | A3   | A4   | Local $\chi^2$ |
|-------------------------|------|------|------|------|----------------|
| 370                     | 0.16 | 0.12 | 0.25 | 0.47 | 0.992          |
| 390                     | 0.16 | 0.14 | 0.20 | 0.50 | 0.996          |
| 410                     | 0.24 | 0.17 | 0.16 | 0.43 | 1.024          |

**Table S8.** Fluorescence decay parameters for the APadj-M.HhaI-AdoHcy single crystal.

**Global Lifetimes:  $\tau_1=0.19\text{ns}$   $\tau_2=0.91\text{ns}$ ,  $\tau_3=3.54\text{s}$ ,  $\tau_4=10.13\text{ns}$**   
**Global  $\chi^2=1.085$**

| Emission Wavelength/<br>nm | A1   | A2   | A3   | A4   | Local $\chi^2$ |
|----------------------------|------|------|------|------|----------------|
| 370                        | 0.61 | 0.30 | 0.07 | 0.02 | 1.117          |
| 390                        | 0.54 | 0.32 | 0.10 | 0.04 | 1.052          |
| 410                        | 0.49 | 0.32 | 0.14 | 0.05 | 1.087          |

**Table S9.** Fluorescence decay parameters for the APopp-M.HhaI-AdoHcy single crystal.

**Global Lifetimes:  $\tau_1=0.15\text{ns}$   $\tau_2=0.94\text{ns}$ ,  $\tau_3=3.41\text{s}$ ,  $\tau_4=9.39\text{ns}$**   
**Global  $\chi^2=1.084$**

| Emission Wavelength/<br>nm | A1   | A2   | A3   | A4   | Local $\chi^2$ |
|----------------------------|------|------|------|------|----------------|
| 370                        | 0.58 | 0.27 | 0.11 | 0.04 | 1.145          |
| 390                        | 0.50 | 0.30 | 0.15 | 0.05 | 1.045          |
| 410                        | 0.44 | 0.31 | 0.17 | 0.08 | 1.062          |

**Table S10.** Fluorescence decay parameters for the APadj duplex in aqueous solution.

**Global Lifetimes:  $\tau_1=0.04\text{ns}$ ,  $\tau_2=0.45\text{ns}$ ,  $\tau_3=2.63\text{ns}$ ,  $\tau_4=10.33\text{ns}$**   
**Global  $\chi^2=1.128$**

| Emission Wavelength/<br>nm | A1   | A2   | A3   | A4   | Local $\chi^2$ |
|----------------------------|------|------|------|------|----------------|
| 370                        | 0.89 | 0.06 | 0.03 | 0.02 | 1.103          |
| 390                        | 0.84 | 0.09 | 0.05 | 0.02 | 1.121          |
| 410                        | 0.77 | 0.14 | 0.07 | 0.02 | 1.159          |

**Table S11.** Fluorescence decay parameters for the APadj duplex with M.HhaI (wild-type) and AdoHcy in aqueous solution.

**Global Lifetimes:  $\tau_1=0.08\text{ns}$ ,  $\tau_2=0.32\text{ns}$ ,  $\tau_3=2.35\text{ns}$ ,  $\tau_4=9.91\text{ns}$**   
**Global  $\chi^2=1.133$**

| Emission Wavelength/<br>nm | A1   | A2   | A3   | A4   | Local $\chi^2$ |
|----------------------------|------|------|------|------|----------------|
| 370                        | 0.83 | 0.12 | 0.03 | 0.02 | 1.152          |
| 390                        | 0.79 | 0.15 | 0.04 | 0.02 | 1.096          |
| 410                        | 0.74 | 0.18 | 0.06 | 0.02 | 1.152          |

**Table S12.** Fluorescence decay parameters for the APOpp duplex in aqueous solution.

**Global Lifetimes:  $\tau_1=0.05\text{ns}$ ,  $\tau_2=0.50\text{ns}$ ,  $\tau_3=2.98\text{ns}$ ,  $\tau_4=9.81\text{ns}$**

**Global  $\chi^2=1.089$**

| Emission Wavelength/<br>nm | A1   | A2   | A3   | A4   | Local $\chi^2$ |
|----------------------------|------|------|------|------|----------------|
| 370                        | 0.69 | 0.12 | 0.09 | 0.10 | 1.100          |
| 390                        | 0.64 | 0.16 | 0.10 | 0.10 | 1.086          |
| 410                        | 0.59 | 0.20 | 0.12 | 0.09 | 1.082          |

**Table S13.** Fluorescence decay parameters for the APOpp duplex with M.HhaI (wild-type) and AdoHcy in aqueous solution.

**Global Lifetimes:  $\tau_1=0.06\text{ns}$ ,  $\tau_2=0.44\text{ns}$ ,  $\tau_3=2.68\text{ns}$ ,  $\tau_4=9.37\text{ns}$**

**Global  $\chi^2= 1.132$**

| Emission Wavelength/<br>nm | A1   | A2   | A3   | A4   | Local $\chi^2$ |
|----------------------------|------|------|------|------|----------------|
| 370                        | 0.69 | 0.16 | 0.07 | 0.08 | 1.149          |
| 390                        | 0.65 | 0.18 | 0.09 | 0.08 | 1.137          |
| 410                        | 0.65 | 0.19 | 0.09 | 0.07 | 1.111          |
